# Supplementary material
Source: HighWire-hosted journal article supplement (https://jcp.bmj.com/highwire/filestream/173878/field_highwire_adjunct_files/0/60111296webonlyfig.pdf)

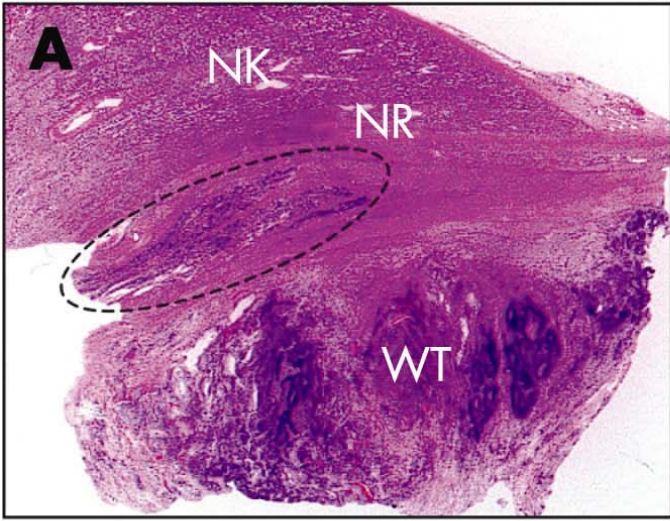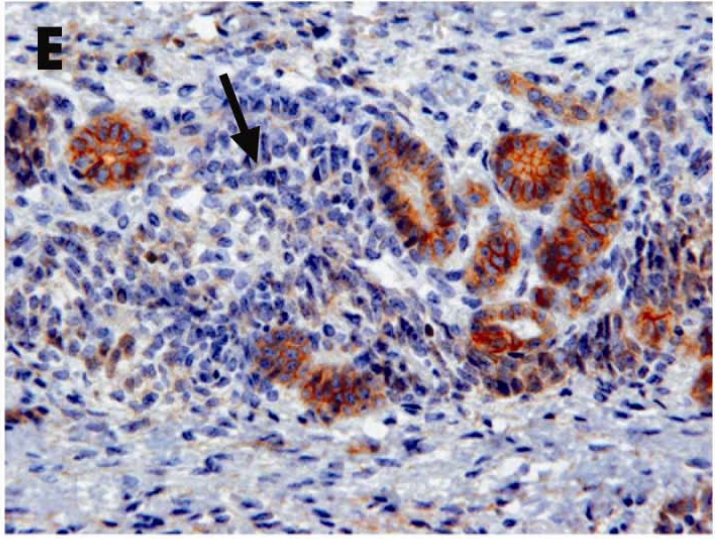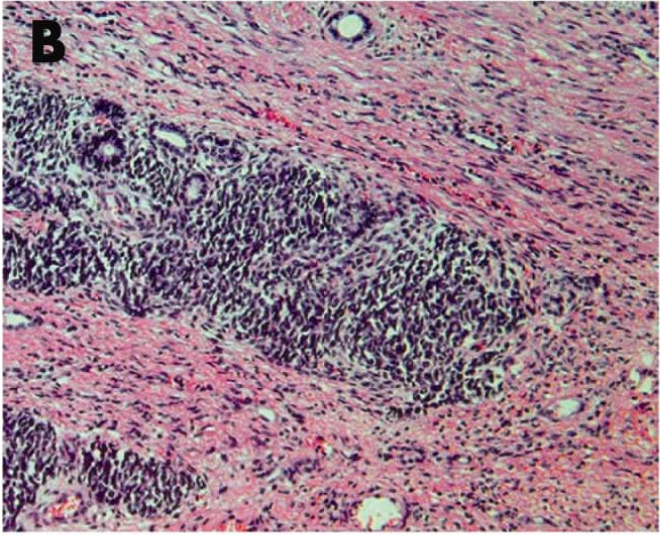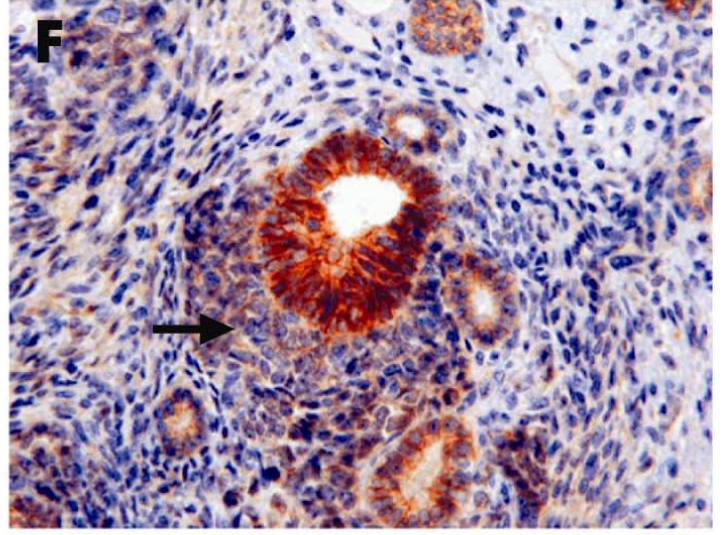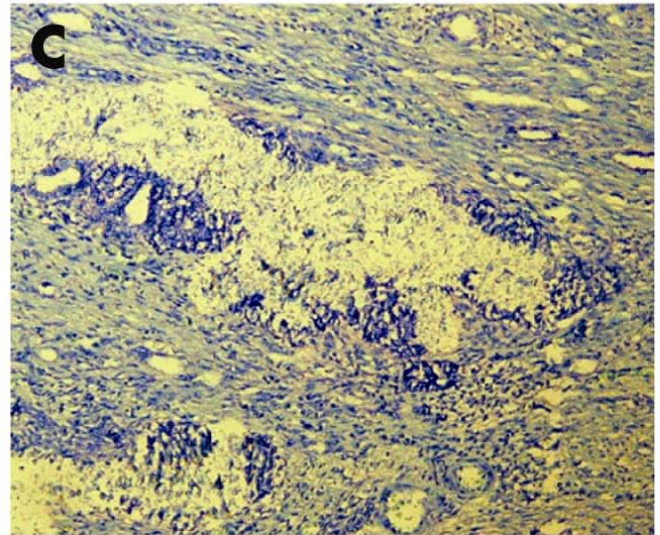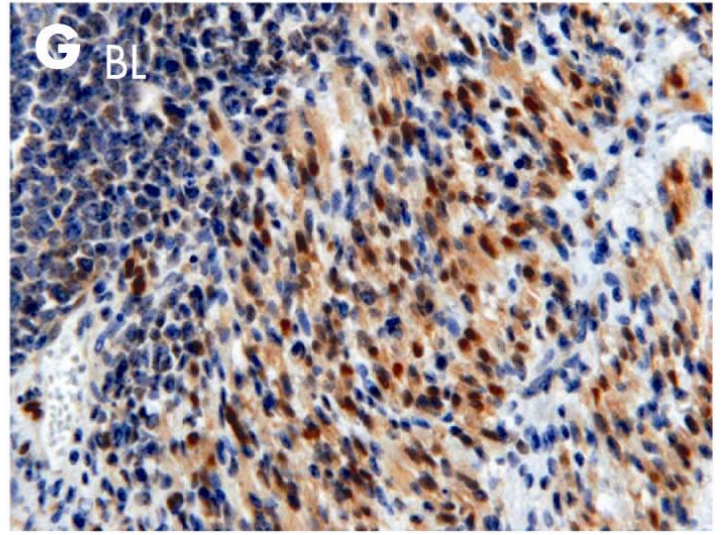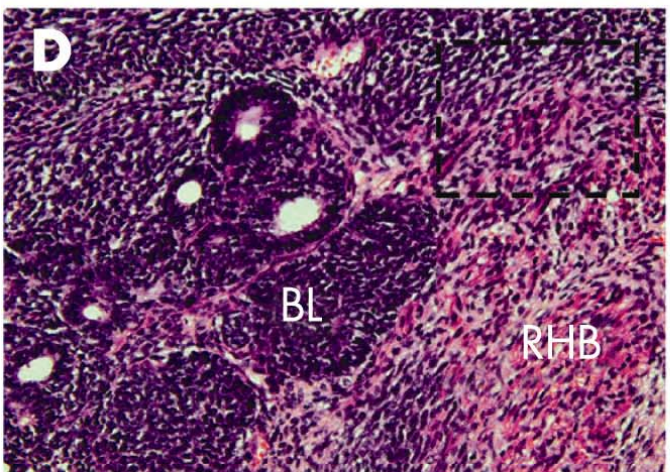

Supplement: 60111296webonlyfig.pdf [file 60111296webonlyfig.pdf]
